# Non-linear genetic regulation of the blood plasma proteome

## Authors

Arnor I. Sigurdsson<sup>1,2,3,\*</sup>, Justus F. Gräf<sup>1,2,3,\*</sup>, Zhiyu Yang<sup>4</sup>, Kirstine Ravn<sup>1,2</sup>, Jonas Meisner<sup>1,2,5</sup>, Roman Thielemann<sup>1,2,3</sup>, Henry Webel<sup>1,2</sup>, Roelof A. J. Smit<sup>2,3,6</sup>, Lili Niu<sup>1</sup>, Matthias Mann<sup>1,7</sup>, FinnGen, Bjarni Vilhjalmsson<sup>3,8,9</sup>, Benjamin M. Neale<sup>3,10,11</sup>, Andrea Ganna<sup>4,10,11,12</sup>, Torben Hansen<sup>2</sup>, Ruth J. F. Loos<sup>2,3,6</sup>, Simon Rasmussen<sup>1,2,3</sup>

## Affiliations

1. Novo Nordisk Foundation Center for Protein Research, Faculty of Health and Medical Sciences, University of Copenhagen, Copenhagen N, Denmark
2. Novo Nordisk Foundation Center for Basic Metabolic Research, Faculty of Health and Medical Sciences, University of Copenhagen, Denmark
3. Novo Nordisk Foundation Center for Genomic Mechanisms of Disease, Broad Institute of MIT and Harvard, Cambridge, MA 02142, USA
4. Institute for Molecular Medicine Finland (FIMM), Helsinki Institute of Life Science (HiLIFE), University of Helsinki, Helsinki, Finland
5. Mental Health Centre Copenhagen, Copenhagen University Hospital, Denmark
6. The Charles Bronfman Institute for Personalized Medicine, Icahn School of Medicine at Mount Sinai, New York, NY, USA
7. Department of Proteomics and Signal Transduction, Max Planck Institute of Biochemistry, Martinsried, Germany
8. National Centre for Register-based Research, Aarhus BSS, Aarhus University, Aarhus, Denmark
9. Bioinformatics Research Centre, Aarhus University, Aarhus, Denmark.
10. Stanley Center for Psychiatric Research, Broad Institute of Harvard and MIT, Cambridge, MA, USA
11. Analytic and Translational Genetics Unit, ATGU, Massachusetts General Hospital, Boston, MA, USA
12. Program in Medical and Population Genetics, Broad Institute of Harvard and MIT, Cambridge, MA, USA

## Author List Footnotes

\*These authors contributed equally

Correspondence: Simon Rasmussen (srasmuss@sund.ku.dk)

34 **Abstract**

35 Although thousands of genetic variants are linked to human traits and diseases, the underlying  
36 mechanisms influencing these traits remain largely unexplored. One important aspect is to  
37 understand how proteins are regulated by the genome by identifying protein quantitative trait loci  
38 (pQTLs). Beyond this, there is a need to understand the role of complex genetics effects such as  
39 dominance and epistasis that regulate plasma proteins and protein biomarkers. Therefore, we  
40 developed EIR-auto-GP, a deep learning-based approach, to identify such effects. Our results  
41 complement the additive genetic regulation identified in previous pQTLs screens by adding a  
42 nuanced view of the complex genetic regulation of plasma proteins. Applying this method to the  
43 UK Biobank proteomics cohort of 48,594 individuals, we identified 138 proteins that were  
44 regulated by non-linear effects, including non-linear covariates (123) as well as genetic dominance  
45 and epistasis (15). We uncovered a novel epistatic interaction between the *ABO* and *FUT3* loci,  
46 and demonstrated dominance effects of the *ABO* locus on plasma levels of pathogen recognition  
47 receptors CD209 and CLEC4M. Furthermore, we replicated these findings and the methodology  
48 across Olink and mass spectrometry-based cohorts and concluded that large sample sizes are  
49 needed to discover more complex genetic effects. Our approach presents a systematic, large-scale  
50 attempt to identify complex effects of plasma protein levels and can be applied to study other  
51 tissues or molecular QTLs.

52

## 53 **Introduction**

54

55 Genome-wide association studies (GWAS) have identified thousands of associations between  
56 genetic variants and phenotypic traits<sup>1</sup>. Despite these discoveries, it remains a significant challenge  
57 to understand how these genetic variants contribute to the phenotypic traits. This is mainly because  
58 the functional impact of many variants is still unknown. This area of focus in modern genetic  
59 research is known as Variant-2-Function (V2F). Addressing the V2F challenge is crucial for  
60 identifying how genetic variants influence biological pathways, which can improve our  
61 understanding of disease mechanisms and allow for more precise drug development<sup>2</sup>.

62

63 In response to this challenge, multi-omics approaches have been applied to population-based  
64 cohorts, typically including transcriptomics, proteomics, metabolomics, or microbiomics<sup>3-8</sup>. Blood  
65 plasma, in particular, serves as an easily accessible and minimally invasive sample for diagnostics  
66 and biomarker discovery. Large-scale blood metabolomics are now available from resources like  
67 the UK Biobank, further enriching our understanding of the genomic basis of complex traits<sup>7</sup>.  
68 Moreover, proteomics-based analyses using either aptamer-based (SomaScan), antibody-based  
69 (Olink) or mass spectrometry (MS)-based assays of individual-level biobank samples have  
70 revealed thousands of protein quantitative trait loci (pQTLs)<sup>5,6,9-14</sup>. These can bridge the gap  
71 between genetic variants and phenotypes and allow for deeper functional understanding of  
72 diseases, improving drug target discovery and contributing to our understanding of genetic effects  
73 on disease<sup>15-17</sup>. Currently, GWAS has been the most widely applied methodology for discovery of  
74 pQTLs. However, GWAS often assumes an additive model and might not fully recapitulate  
75 complex, non-additive effects among the variants and relevant covariates. Despite its robustness,  
76 it has been shown that deviations from the additive model exist in a number of human loci, for  
77 example in the form of dominance effects<sup>18</sup>. Additionally, interactions of two or more variants can  
78 result in a larger effect on a phenotype than the effect of each single variant, a concept known as  
79 epistasis, which can also contribute to non-linear genetic architecture of complex traits<sup>19-21</sup>.

80

81 DL models can capture non-linear effects, which has motivated recent work in applying DL and  
82 other non-linear models for both genetic prediction and variant-phenotype association, providing  
83 new insights into the genetic architecture of complex traits<sup>22-26</sup>. For example, in previous studies,

84 we developed and applied DL frameworks for disease prediction in the UK Biobank<sup>27</sup>, and found  
85 potential dominance and epistatic effects, specifically for immunological diseases such as type 1  
86 diabetes (T1D), involving the insulin gene and *HLA-DQB1*<sup>28-30</sup>. These complex effects also  
87 transfer to molecular quantitative trait loci, as indicated by our previous analysis of 34 common  
88 biomarkers in the UK Biobank<sup>31</sup>. Additionally, targeted discovery of epistatic effects between  
89 genetic variants uncovered the presence of interactions between the *ABO* blood group and the  
90 *FUT2* secretor status that influence blood plasma abundance of gastrointestinal (GI) proteins<sup>6</sup>.  
91 Unbiased approaches have been used to identify numerous epistatic and dominance effects that  
92 influence the plasma levels of lipids and their effects on cardiovascular diseases<sup>32</sup>. However, by  
93 now, there have not been attempts to systematically characterize non-linear effects that influence  
94 blood plasma protein levels.

95  
96 Here, we present a systematic, DL-based workflow that allows us to identify non-linear effects  
97 like non-linear covariate effects, dominance, and epistasis that influence plasma protein levels. To  
98 demonstrate the use of our approach, we examined data from 2,922 blood plasma protein levels  
99 measured in 48,594 individuals from the UK Biobank Pharma Proteomics Project (UKB-PPP).  
100 Our study presents a nuanced view of non-additive effects that influence plasma proteomics in the  
101 UK Biobank. We could illustrate the quantitative and qualitative non-linear regulation of the blood  
102 plasma proteome and reveal novel non-linear effects that are highly likely to influence plasma  
103 protein abundance. Using our approach, we identified 138 proteins, among which 123 were  
104 potentially regulated by non-linear covariate effects and 15 by dominance or epistasis effects. This  
105 highlights DL as a useful tool to uncover complex effects that influence molecular quantitative  
106 traits, which can contribute to our understanding of the genetic architecture of complex traits.

107 **Results**

108

109 **Modeling blood plasma protein levels using deep learning**

110 To investigate the scale of non-linearity of genetic control of protein abundances in the blood  
111 plasma, we modeled the abundance of 2,922 proteins in the blood plasma proteome in the UKB  
112 cohort. Based on our deep learning framework, EIR, and the genome-local net deep learning  
113 architecture (GLN)<sup>27</sup>, we developed an automated framework, EIR-auto-GP, to predict the  
114 abundance of a protein from genotypes and covariates (age, sex, UKB center, UKB genetic array,  
115 whether an individual was consortium selected and genetic principal components 1-20 (**Figure**  
116 **1a**). We used grouped, self-reported ethnicities (**Methods**) that resembled the distribution of the  
117 genetic population structure in the UKB to subset individuals of UK-white self-reported ethnicity  
118 as the largest group of individuals with similar ancestral background for model training and testing  
119 (**Supplementary Figure 1a**). Subsequently, after quality control (QC) of the proteomics data, the  
120 remaining 48,594 individuals were split into a train (n=34,947), validation (n=2,000) and test split  
121 (n=1,771) (**Figure 1a**). As input to EIR-auto-GP, we used 424,097 measured QC-passed  
122 genotypes, which reduced computational complexity compared to the more extensive imputed  
123 data. Furthermore, we limited the amount of input variants by using the training dataset to conduct  
124 GWAS for each protein and selecting associated variants (**Supplementary Note 1**). When  
125 analyzing the results of the per-protein GWAS we found them to be consistent overall with  
126 previous work<sup>6</sup>, and overlapping variants showed high correlation (**Figure 1b**). To determine input  
127 variants for the DL modeling, we used a less stringent p-value threshold than usually applied to  
128 GWAS (P<0.001), resulting in most DL models being trained on  $\leq 1,000$  variants (**Figure 1c**).  
129 Taken together, the variants identified through our GWAS and subsequently used as inputs for the  
130 DL models were likely pQTL candidates.

131

**Figure 1**

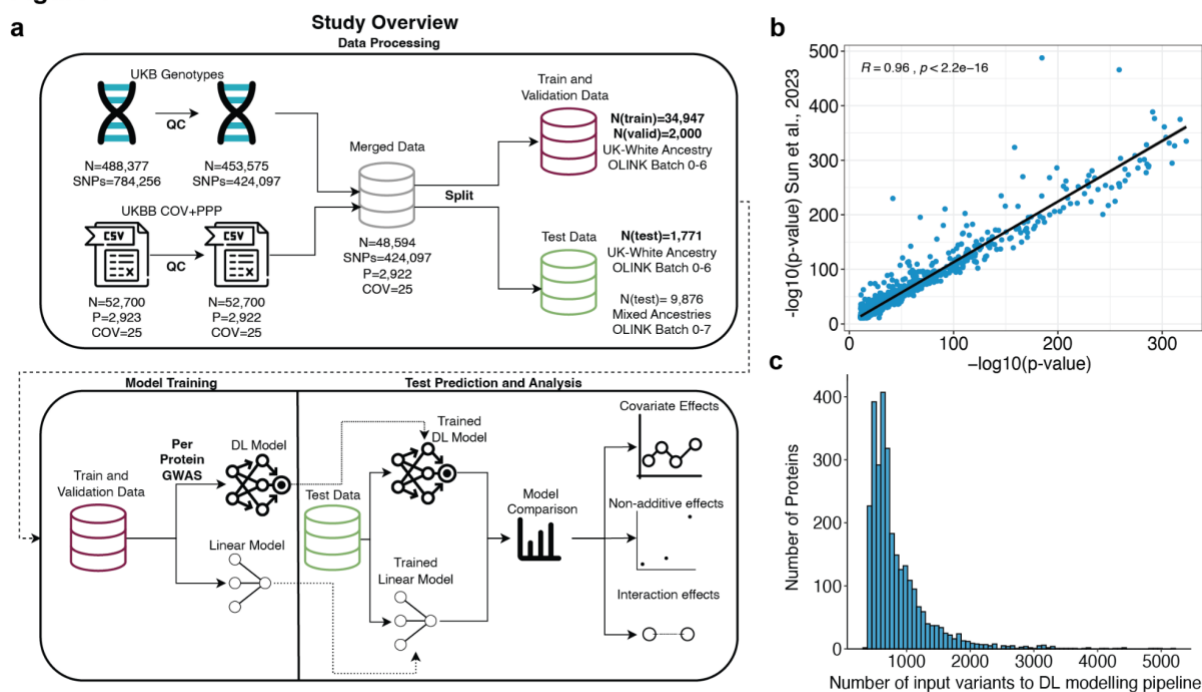

132  
 133 **Figure 1. Overview of the study and protein pre-GWAS results. a)** Overview of study design and workflow.  
 134 UKB genotypes underwent quality control (QC), resulting in 424,097 QC-passed SNVs. The data were split into  
 135 training and validation sets of self-reported UK-white ethnicity, OLINK batch 0-6 (n=34,947 for training; n=2000 for  
 136 validation), and test sets stratified by ethnicity and batch: UK white self-reported ethnicity (n=1,771) and mixed  
 137 ethnicities (n=9,876), all from OLINK batches 0-6 and 0-7 respectively. The training and validation data were used  
 138 to develop DL and linear models, with a per-target GWAS on the training set used to pre-filter input variants for  
 139 training the DL model. Finally, predictions and analyses were performed on the test data, and proteins that had  
 140 discordant performance between the DL and linear models were investigated for non-linear covariate, non-additive  
 141 (e.g., dominance), and interaction (e.g., epistasis) effects. **b)** Correlation of GWAS P-values between the current study  
 142 and Sun et al.<sup>6</sup>. Variants with p-values exactly 0, likely due to being below the numerical precision threshold  
 143 (underflow), were omitted from the plot. The scatter plot represents the  $-\log_{10}(\text{p-values})$  correlation of 1,780  
 144 overlapping genetic variants with significant associations ( $p < 1.7e-11$ ) between our analysis and Sun et al.<sup>6</sup>. The strong  
 145 correlation ( $R=0.96, P < 2e-308$ ) between p-values demonstrates consistency in identifying significant associations. **c)**  
 146 Histogram of the number of input SNVs used for DL model training following per target GWAS pre-filtering, where  
 147 only SNVs with p-values  $< 0.001$  (computed on the training set) were considered. For the majority of proteins, fewer  
 148 than 1,000 SNVs passed the threshold.

149  
 150 **Non-linear effects that influence blood plasma protein abundance**

151 The performance ( $R^2$ ) of the DL and linear models reached up to 0.95 and 0.86 with a median  
 152 performance of 0.04 and 0.03, respectively (**Figure 2a, Supplementary Figure 2a-b**). We found

153 an association between proteins with low modeling performance ( $R^2 < 0.1$ ) and the correlation of  
154 their measurements with SomaScan measurements in an Icelandic cohort<sup>14</sup> (**Supplementary Note**  
155 **2**). To investigate how many blood plasma proteins could be influenced by non-linear covariates  
156 and genetic effects, we compared the performance of the DL models (EIR-auto-GP) to a penalized  
157 linear model (bigstatsr)<sup>33</sup>. We calculated the difference in model performance on the UK-white  
158 test set ( $n=1,771$ ) for each protein (**Supplementary Table 1**). For 1,503 of 2,922 proteins (51.4%),  
159 the DL model performed better, resulting in a significant difference when modeling plasma protein  
160 abundance from genotypes and covariates (paired T-test, two-sided,  $t=11.281$ ,  $P=6.4e-29$ ). To  
161 identify specific proteins for which the DL model was significantly better, we bootstrapped the  
162 predictions of each protein (**Methods**) and identified 171 proteins (5.8%) with a significant  
163 performance increase (non-overlapping 95% confidence intervals) (**Figure 2a, Supplementary**  
164 **Figure 2b**). These proteins showed a median increase in  $R^2$  of 0.038 (mean 0.05). To examine  
165 whether these results transferred to other metrics, we additionally used Root Mean Squared Error  
166 (RMSE) to assess model performance. Among the 171 proteins showing better performance with  
167 the DL model as measured by  $R^2$ , the RMSE analysis also found the DL model outperforming on  
168 all of these. Specifically, 28 of these proteins also showed significant improvement (non-  
169 overlapping confidence intervals). In summary, we replicate that linear models are robust in  
170 modeling plasma abundance of measured proteins<sup>6,18</sup> and that our DL approach can identify  
171 candidate proteins with potential non-linear effects that influence their plasma levels.

172

### 173 **EIR-auto-GP can identify non-linear effects using NPX and INT protein abundance data**

174 To preserve most of the protein level variance, we modeled the Olink protein expression values  
175 (NPX); however, these are non-normal distributed and on a  $\log_2$ -like scale<sup>6</sup>. This could favor the  
176 DL model over the linear model without biological non-linear effects because a  $\log_2$  transformation  
177 can make a fundamentally linear relationship appear non-linear. Therefore, we re-ran our models  
178 for the 171 proteins using Inverse-rank Normal Transformed (INT) protein levels and found  
179 reduced  $R^2$  for both DL and linear models, suggesting that information was lost when rank-  
180 transforming the protein levels (**Figure 2b, Supplementary Table 2**). Despite this reduction in  
181 performance, we found that for 138 (81%) of the 171 proteins, a significant gap in performance  
182 between the DL and linear models remained (**Figure 2c**). Conversely, for 33 of the 171 proteins  
183 the difference between the DL and linear models was not significant anymore (**Figure 2c**). Where



184 indicated, these 33 proteins were excluded from downstream analyses. The performance gap of  
 185 most of the remaining proteins correlated well between NPX and INT normalized values,  
 186 indicating that the DL model also identified non-linear effects on INT normalized protein values  
 187 (Figure 2c).  
 188

**Figure 2**

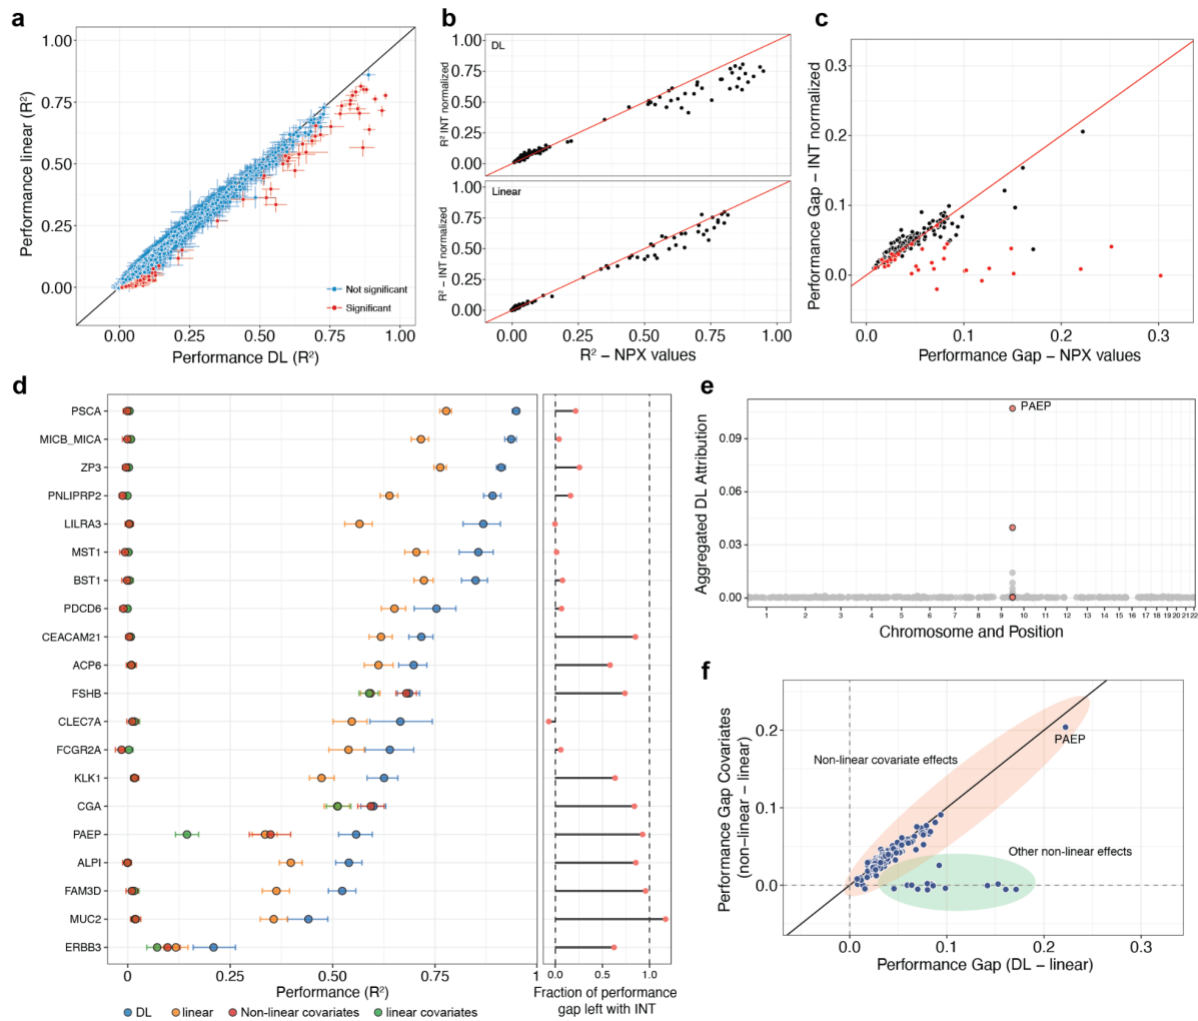

189  
 190 **Figure 2. Deep learning reveals non-linear genetic and covariate effects.** **a** DL (EIR) and linear (bigstatsr) model  
 191 performance ( $R^2$ ) for all 2,922 proteins (**Supplementary Table 1**). The error bars indicate the 95% confidence  
 192 intervals (CI) from 1,000 bootstraps, and proteins with non-overlapping confidence intervals between DL and linear  
 193 models are called significant and labeled in red. **b** DL (top) and linear (bottom) model performance of 171 significant  
 194 proteins modeled on raw protein expression values (NPX) or INT normalized protein values (**Supplementary Table**  
 195 **2**). **c** Performance gap ( $R^2 - R^2$ ) for the 171 significant proteins between DL and linear models (DL-linear) on NPX or  
 196 INT normalized protein values. Proteins labeled in red indicate that no significant performance gap (overlapping CIs)



197 was found when modeling on INT normalized protein values **d**) DL and linear model performance for the top 20  
198 significant proteins with the largest absolute performance gap in  $R^2$  between the DL and linear models are shown.  
199 Additionally, performance of linear and non-linear (XGBoost) models trained only on covariates are shown  
200 (**Supplementary Table 3**). The covariates include demographic information (age and sex), the genetic array, genetic  
201 principal components (GPC1-GPC20), whether individuals were consortium selected, and the research center location  
202 for participant measurement. On the right, the fraction of the performance gap that remains when modeling on INT  
203 values instead of NPX protein levels is shown. **e**) Aggregated DL attribution of 487 SNVs across the genome that was  
204 used as input to model PAEP protein levels. Variants located within the *PAEP* gene are labeled in red. **f**) Performance  
205 gap ( $R^2$ - $R^2$ ) between DL and linear models on genotype and covariates against the performance gap between non-  
206 linear (XGBoost) and linear models on covariates only. Orange and green areas indicate if protein levels underlie non-  
207 linear covariate effects or other non-linear effects in the input data.

208

### 209 **Genetics was the main driver of model performance for a subset of proteins**

210 We then investigated the proteins with the largest absolute increase in performance by either  
211 method (top 20) (**Figure 2d**). For these proteins, the DL model reached an  $R^2$  between 0.21  
212 (ERBB3) to 0.95 (PSCA) on the test set (**Figure 2d**). Among these 20 proteins, 11 showed a  
213 maintained significant performance gap with the INT normalization. To investigate the  
214 contribution of covariates on the performance, we trained and evaluated linear and non-linear  
215 (XGBoost<sup>34</sup>) models using only the covariates (**Supplementary Table 3**). We found that for 8 of  
216 these 11 proteins, the genotype data was the main driver of model performance (**Figure 2d**). For  
217 example, the DL performance of PSCA and FAM3D was mainly driven by known cis- and trans-  
218 pQTL (**Supplementary Figure 2e**), which was expected due to their high association in previous  
219 studies<sup>6</sup>. For some proteins, for instance, MICB/A and LILRA3, where genetics primarily  
220 contributed to the DL model performance, there was no difference in performance between the DL  
221 and linear model when modeling on INT normalized values (**Figure 2d, right panel**). However,  
222 other proteins showed sustained performance gaps when modeling on INT normalized values,  
223 providing additional confidence that the increased DL performance might be caused by non-linear  
224 genetic effects (e.g., CEACAM21, ALPI, FAM3D, or MUC2).

225

### 226 **Non-linear covariate effects influence protein levels**

227 For 3 of the 11 significant proteins, we found that non-linearities in the covariates could account  
228 for the entire gain in performance (FSHB, CGA & PAEP) (**Figure 2e**). For instance, the gain in  
229  $R^2$  for follicle stimulating hormone subunit beta (FSHB) could be entirely explained by the

230 covariates sex and age, related to the age of menopause (**Figure 2e, Supplementary Figure 2f**)<sup>6</sup>.  
231 Furthermore, for progesterone-associated endometrial protein (PAEP), we found that a  
232 combination of covariates and genetics could account for the increased model performance  
233 (**Figure 2d**). Besides age and sex related non-linear effects (**Supplementary Figure 2f**), PAEP  
234 levels were influenced by cis-pQTLs which contributed to model performance (**Figure 2e**). When  
235 expanding the analysis to all 138 proteins with significant differences, we found that for 123  
236 performance gap between DL and linear models could be explained by non-linear covariate effects  
237 (**Figure 2f**). These results indicate that we could robustly identify proteins with plasma levels that  
238 underlie non-linear covariate effects, which was in line with the non-linear modeling of covariates  
239 in other studies<sup>25</sup>. However, it also revealed that for a substantial fraction of the 138 proteins  
240 (10.9%, 15 proteins) effects in the covariates could not account for the increased performance of  
241 the DL model to the linear model (**Figure 2f**). This suggests that the improved predictive accuracy  
242 obtained with the DL model was not solely due to non-linear covariate effects.

243

#### 244 **Dominance in the *ABO* locus influences plasma levels of CD209 and CLEC4M**

245 Next, we investigated the contribution of dominant genetic effects in modeling plasma protein  
246 levels. Because dominance effects can be modeled by a linear model when using non-additive  
247 encoded genotypes, such as one-hot encoding, we compared non-linear (XGBoost) and linear  
248 models on genotype data using additive and non-additive encoding (**Supplementary Table 4**). To  
249 focus on key genetic variants, we utilized the DL model feature importance computed on the  
250 validation set to select the top 128 SNVs (**Methods**). This reduced set allowed us to use XGBoost,  
251 which is known for its robust performance on structured data<sup>35,36</sup> but might not scale as efficiently  
252 to the high-dimensional datasets. Comparing the non-linear XGBoost with linear models served  
253 as an additional verification of non-linear effects beyond the original models trained on the full set  
254 of features. We found that for a group of proteins (CD209, CLEC4M, ABO, PSCA) using a linear  
255 model with non-additive encoding of genotypes improved the performance of the linear model to  
256 be almost equal to the non-linear model (**Figure 3a**). This indicated that the non-linear effects  
257 underlying their plasma levels were likely due to genetic dominance. Furthermore, we identified  
258 multiple proteins where the non-additive model could partly improve the performance of the linear  
259 model (e.g., KLK1, FAM3D, MUC2, ALPI, CEACAM21 and more) (**Figure 3a**). This indicated  
260 that for these proteins, both dominance effects but also other non-linear genetic effects influenced

261 their plasma levels. We found that two variants in the *ABO* locus (rs505922, rs8176719, chr 9)  
262 showed dominance effects on protein levels for CD209, CLEC4M, FAM3D, ALPI, ABO and  
263 MUC2 (**Supplementary Figure 3a**). CD209 is part of the C-type lectin family and is involved in  
264 cell adhesion and pathogen recognition<sup>37</sup>. It is highly similar to CLEC4M in function and  
265 sequence. The two genes are located nearby on chr 19<sup>37,38</sup> and are referred to as *DC-SIGN* and *DC-*  
266 *SIGNR*, respectively. Notably, the two variants, rs505922 and rs8176719, were used to impute the  
267 blood-types of the *ABO* blood group system in the UKB<sup>39-42</sup>, which is known to have co-  
268 dominance effects of its A and B alleles. Consistent with this, and the non-additive analyses above  
269 (**Figure 3a**), we found dominant blood group effects on the plasma levels of CD209 and CLEC4M  
270 (**Figure 3b-c, Supplementary Figure 3b**). We assessed the influence of the dominance effect on  
271 model performance by training linear models for CD209 and CLEC4M using genotype and  
272 covariate data and one-hot encoded either rs8176719, rs505922 or both. We found that by one-hot  
273 encoding these variants the model performance improved by  $R^2$  0.03 (7%), 0.0396 (9.21%) and  
274 0.0399 (9.28%) (**Supplementary Figure 3c**). Taken together, using our approach, we could  
275 identify varying levels of dominance within loci that regulate plasma protein levels.

276

### 277 **Non-linear interactions between genetic variants affect protein levels**

278 Following the previous results, we further investigated proteins where the increased  $R^2$  could not  
279 be explained by non-linear covariate effects to identify potential epistatic SNV-SNV interactions.  
280 For each of these 15 proteins, we analyzed the 128 SNVs with the highest feature importance in  
281 the DL models on the validation set. To achieve this, we applied pairwise Ordinary Least-Squares  
282 (OLS) models to the training set (n=34,947) to identify epistatic interactions. Restricting our  
283 analysis to SNV pairs on different chromosomes, we identified at least one significant (p-value  
284  $<4.46e-08$ ) interaction for 8 of the 15 proteins and a total of 784 interactions between 67 unique  
285 SNVs on 5 chromosomes (**Figure 3d-e, Supplementary Table 5**). The majority of these  
286 interactions (753, 96%) were between variants on chr 9 and chr 19 and most of the interacting  
287 variants were located near the *ABO* and *FUT2* loci on chr 9 and 19, respectively (**Figure 3e,**  
288 **Supplementary Figure 3d-e**). For instance, we identified most interactions for ALPI, MUC2,  
289 FAM3D and CDH17 with 230, 216, 172 and 72 interactions, of which 31, 31, 40 and 9 were  
290 between variants within the *ABO* and the *FUT2* locus ( $\pm 10$ kb) (**Figure 3f**). We found an epistatic  
291 interaction between the *ABO* variant rs507666 and rs2307019, a variant in the *IZUMO1* gene, 40kb

292 downstream of the *FUT2* locus, that influenced plasma levels of these proteins (**Figure 3g**). The  
293 variant rs2307019 was in moderate linkage disequilibrium ( $R^2=0.35$ ) with rs601338 (Trp154Ter),  
294 a variant that determines *FUT2* secretor status used in Sun et al., and Snaebjarnarson et al.<sup>6,32</sup>  
295 (**Supplementary Figure 3f**). We thus expected that the interaction between rs507666 and  
296 rs2307019 resembled an interaction between the *ABO* and *FUT2* locus. In line with our studies,  
297 Sun et al. found that epistatic interactions between the *ABO* and *FUT2* locus have a strong  
298 influence on the blood plasma levels of ALPI, MUC2, and FAM3D<sup>6</sup>. To assess if the interaction  
299 between rs507666 and rs2307019 influenced modeling performance when predicting plasma  
300 proteins levels, we trained linear models using one-hot encoded genotypes and covariates and  
301 added an interaction term for rs507666-rs2307019 to predict levels of ALPI, FAM3D, MUC2 and  
302 CDH17. We found that, when adding the single interaction term, the linear models improved by  
303  $R^2$  0.021 (5.1%), 0.024 (5.3%), 0.017 (4.5%) and 0.007 (2.3%) respectively, indicating that this  
304 epistatic interaction accounts for a substantial fraction of model performance (**Figure 3h**). In  
305 summary, these results demonstrate that EIR-auto-GP could identify proteins with epistatic  
306 interactions between genetic variants, which we could subsequently validate using targeted OLS  
307 models.  
308

**Figure 3**

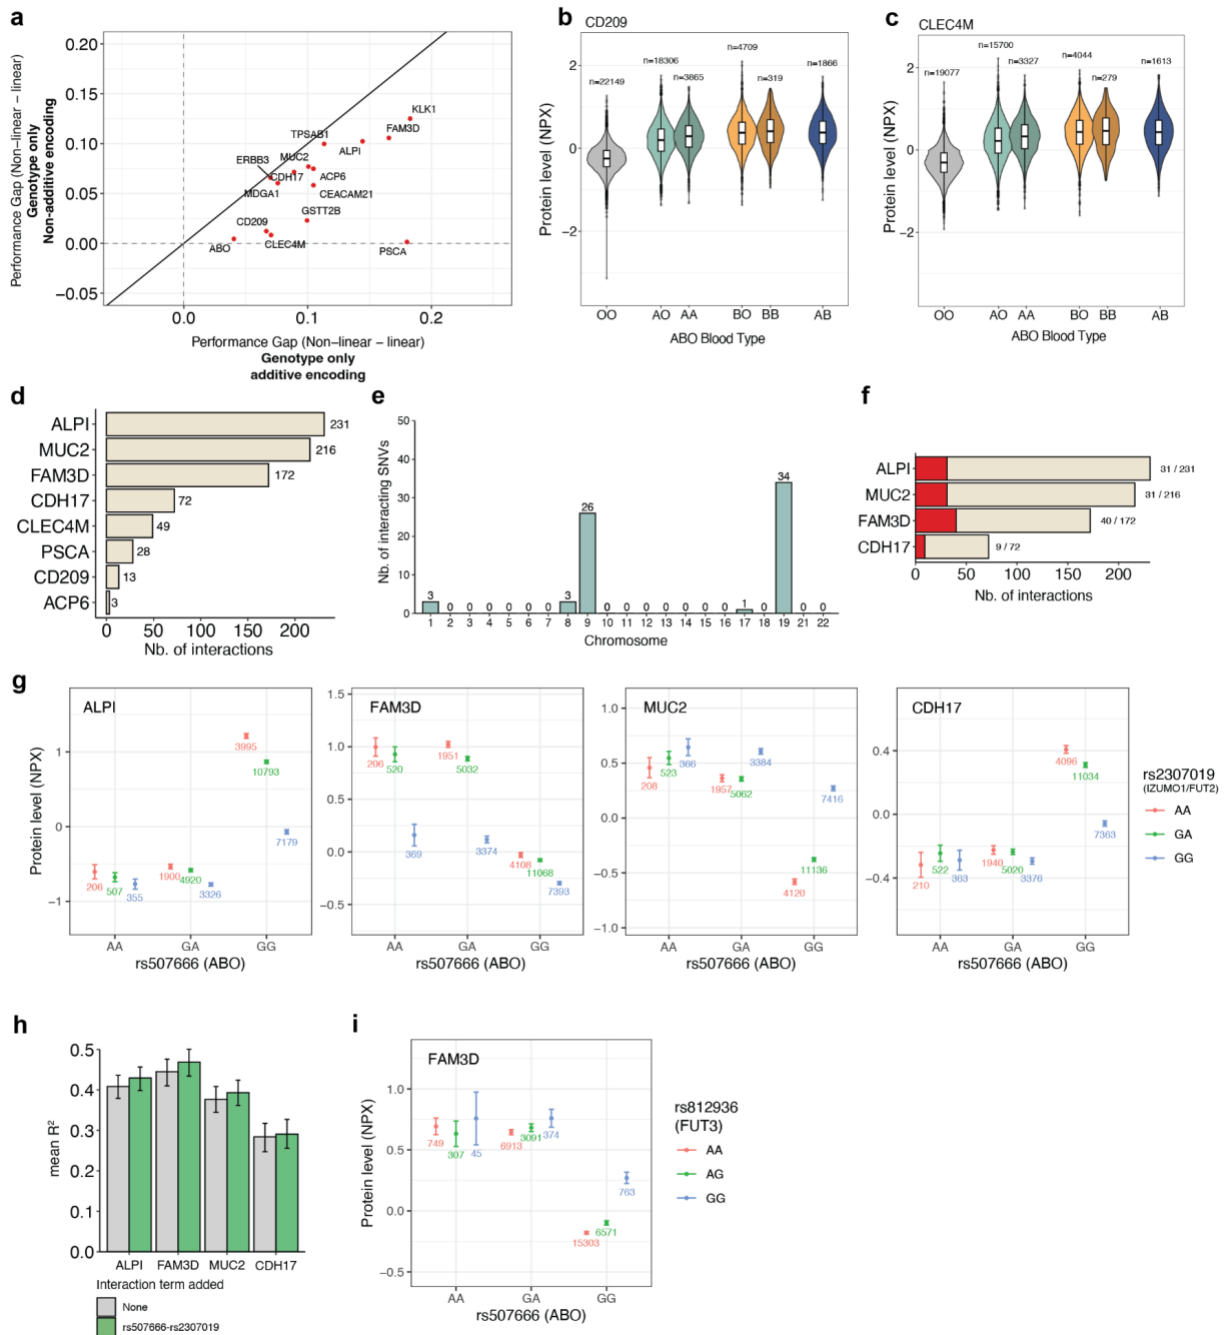

309  
310 **Figure 3. Identification of dominance effects and epistatic interactions between genetic variants on separate**  
311 **chromosomes that influence protein levels. a)** Performance gap (R<sup>2</sup>-R<sup>2</sup>) between non-linear (XGBoost) and linear  
312 models trained and tested on additive or non-additive encoded genotype data for 15 candidate proteins with potential  
313 non-linear genetic effects. **b)** NPX protein levels of CD209 (n=51,214) in individuals in the UK Biobank, stratified  
314 by their imputed *ABO* blood group (field p23165)<sup>39–42</sup>. **c)** NPX protein levels CLEC4M (n=44,040) in individuals in  
315 the UK Biobank, stratified by their imputed *ABO* blood group. **d)** Number of identified SNV-SNV interactions

316 ( $p < 3.6e-08$ ) per protein. 171 proteins with significant gap in performance between DL and linear model were tested  
317 in an Ordinary least-squares (OLS) model, of which 14 had at least one significant interaction and of which 6 were  
318 excluded due to potential false positive non-linear effect (**Figure 2b, c**). Interactions were limited to interactions  
319 between SNVs on two different chromosomes. **e**) Number of unique interacting SNVs per chromosome. **f**) Number  
320 of interactions between SNVs on *ABO* and *FUT2* loci (+/- 10kb) as a fraction of the total number of interactions for  
321 each protein. **g**) Protein expression levels (NPX) of ALPI, MUC2, FAM3D and CDH17 for individuals of the training  
322 dataset ( $n=34,947$ ) with all combinations of genotypes of the interacting variants rs507666 (*ABO*) and rs2307019  
323 (*IZUMO1/FUT2*). Error bars indicate the 95% confidence interval and the number of individuals with the respective  
324 interaction are shown below each data point. **h**) Linear model performance to predict ALPI, FAM3D, MUC2 and  
325 CDH17 plasma levels trained on one-hot encoded genotypes and covariates. Interaction between rs507666 and  
326 rs2307019 was added as a single term to assess performance improvement. Error bars indicate 95% confidence interval  
327 of 1000 bootstraps. **i**) Protein levels of FAM3D for all genotype combinations of the interacting variants rs507666  
328 (*ABO*) and rs812936 (*FUT3*) for individuals from the training dataset ( $n=34,947$ ). Error bars indicate the 95%  
329 confidence interval and the number of individuals with the respective interaction are shown below each data point.

330

### 331 **FAM3D protein levels depend on interactions between *ABO* and *FUT3* loci**

332 In addition to the previously reported interactions between *ABO* and *FUT2* above, we identified  
333 an interaction between *ABO* (rs507666) and the *FUT3* locus (rs812936) that influenced the blood  
334 plasma levels of FAM3D, which is expressed in the gastrointestinal tract (**Figure 3i**). The *FUT3*  
335 locus is also known as the Lewis gene, and encodes an alpha(1,3/4)-fucosyltransferase as part of  
336 the Lewis antigen system<sup>43</sup>. rs812936-A, was associated with increased levels of FUT3 plasma  
337 levels<sup>44</sup> and led to decreased FAM3D plasma levels when interacting with rs507666-G in the *ABO*  
338 locus (**Figure 3i**). This suggested that the protein level of FAM3D was not only regulated by  
339 epistatic interactions between *ABO* and *FUT2*, but also dependent on interactions between *ABO*  
340 and *FUT3* variants. As *FUT2* and *FUT3* are located 45 Mbp apart on chr 19 this was likely not  
341 caused by LD between the two genes (**Supplementary Figure 3e**). Other proteins influenced by  
342 *ABO-FUT2* interactions were enriched for gastrointestinal (GI) expression and may be perturbed  
343 in GI disease<sup>6</sup>. We identified *ABO-FUT3* interactions for FAM3D, a GI expressed protein, and  
344 thus speculated that *FUT3* could also be involved in regulating plasma abundance of GI expressed  
345 proteins. However, when we added this interaction term to a linear model predicting FAM3D  
346 levels, the performance did not improve (**Supplementary Figure 3g**). Notably, this interaction  
347 was relatively rare in the UKB-PPP with 763 individuals in the training set, 47 in the valid set and  
348 37 in the test set that carried this interaction. This indicates that rare interactions might be relevant  
349 in regulating plasma protein levels, but that they were difficult for our DL model to detect because



350 improvements for only a few individuals in the validation set are not likely to be prioritized by the  
351 model.

352

### 353 **Variable non-linear improvements across self-reported ethnicities**

354 Given the importance of understanding model performance across diverse ethnic groups<sup>45-49</sup>, we  
355 investigated how the performance of the linear and DL models trained and evaluated on self-  
356 reported UK white ethnic background transferred to other self-reported ethnic backgrounds  
357 (“South Asian”, “East Asian”, “African” and “Caribbean”) in the UKB (**Methods**). We generally  
358 observed a decline in performance for both DL and linear models across the non-UK white ethnic  
359 groups, accompanied by larger confidence intervals for the 138 proteins with non-linear effects  
360 (**Supplementary Figure 4a-b, Supplementary Table 6**). Overall, the linear model transferred  
361 better to the ‘East Asian’ and ‘South Asian’ test set than the DL models, while the DL models  
362 transferred better to ‘African’ and ‘Caribbean’ test sets than the linear models (**Supplementary**  
363 **Figure 4a-b**). One contributing factor could be the breakdown and formation of LD patterns across  
364 populations, as models trained on the UK white group may select tagging variants that do not  
365 replicate in the other ethnic groups<sup>48,50</sup>. Additionally, the larger confidence intervals could also be  
366 partly due to the smaller number of samples available in ethnicity test sets. We observed correlation  
367 of performance gaps (mean bootstrapped  $R^2$  DL-linear) between all ethnicity groups, except  
368 between ‘East Asian’ and ‘African’ and ‘Caribbean’ (**Figure 4a**). For instance, the DL model  
369 outperformed the linear model for CD209 on the ‘South Asian’ and ‘African’ test set, while it  
370 showed similar or worse performance on ‘East Asian’ and ‘Caribbean’ test sets (**Figure 4b**).  
371 Despite this, CD209 levels showed similar trends when stratified by *ABO* blood type between the  
372 different ethnicity groups in the whole UKB-PPP (n=52,700) (**Figure 4c**). Notably, the distribution  
373 of *ABO* blood types was different between the ethnic groups in the UKB-PPP, which could  
374 influence the performance on the different test sets (**Supplementary Figure 4c**). Above, we found  
375 that the DL model could identify non-linear relationships between age and sex for FSHB (**Figure**  
376 **2d, Supplementary Figure 2f**) and we found that this could be replicated in the ‘South Asian’,  
377 but not in the ‘East Asian’, ‘Caribbean’ or ‘African’ test sets (**Figure 4d**). Despite that, we  
378 observed non-linear relationships between age and sex for FSHB in the test sets of non-white self-  
379 reported ethnicities (**Supplementary Figure 4**). This might be due to the penalized linear model  
380 being less affected by the higher genetic diversity found in African and Caribbean populations<sup>51,52</sup>.



381 Finally, the non-linear effects for FAM3D, likely caused by epistatic interactions (**Figure 3d-e**)  
 382 could not be fully replicated across the ethnicity test sets (**Figure 4e**). The DL model only  
 383 outperformed the linear models slightly on ‘South Asian’, ‘East Asian’ and ‘Caribbean’ tests set  
 384 with a much smaller extent. As above, this could be due to different LD patterns or variants not  
 385 replicating across the ethnic test sets. In summary, these results suggest that cross ethnicity training  
 386 is likely needed for the non-linear patterns of the DL model to transfer to individuals from diverse  
 387 ethnicities that the model was not trained on.  
 388

**Figure 4**

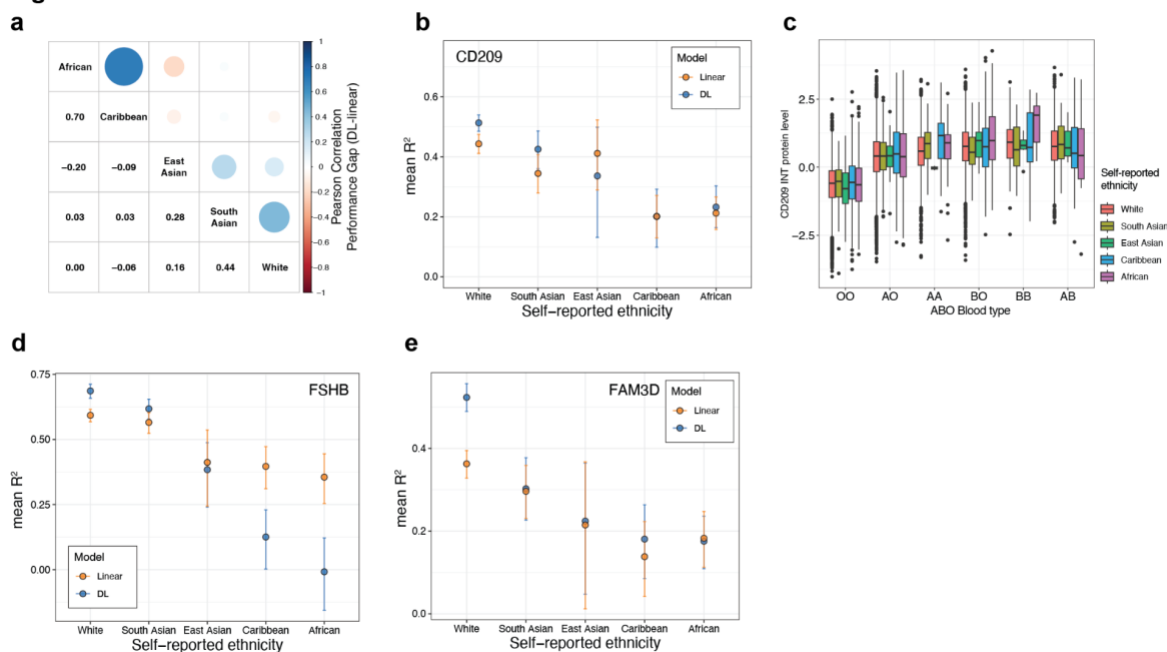

389 **Figure 4. Examples of deep learning and linear model performance across self-reported ethnicities.** **a)** Pearson  
 390 correlation between the performance gap (mean bootstrapped R<sup>2</sup> DL-linear) of models between different self-reported  
 391 ethnicities for 138 proteins with potential non-linear effects in the UK Biobank. The models were trained on  
 392 individuals of self-reported ‘white’ ethnicity and tested on individuals of ‘White’, ‘South Asian’, ‘East Asian’,  
 393 ‘Caribbean’ or ‘African’ self-reported ethnicities. If the R<sup>2</sup> was negative for both models, the performance gap was  
 394 set to 0. **b)** Mean bootstrapped performance of DL and linear models for CD209. The models were trained on  
 395 individuals of self-reported ‘white’ ethnicity and tested on individuals of the respective self-reported ethnicities. The  
 396 error bars indicate the 95% confidence intervals. **c)** INT normalized CD209 levels stratified by ABO blood type among  
 397 the different self-reported ethnicities. AO and AA blood type correspond to A blood group, and BO and BB blood  
 398 type correspond to B blood group. **d)** Mean bootstrapped performance of DL and linear models for FSHB. The models  
 399 were trained on individuals of self-reported ‘white’ ethnicity and tested on individuals of the respective self-reported  
 400 ethnicities. The error bars indicate the 95% confidence intervals. **e)** Mean bootstrapped performance of DL and linear  
 401

402 models for FAM3D. The models were trained on individuals of self-reported ‘white’ ethnicity and tested on  
403 individuals of the respective self-reported ethnicities. The error bars indicate the 95% confidence intervals.

404

#### 405 **Replication of non-linear effects and validation of the EIR-auto-GP workflow in FinnGen**

406 We replicated our findings of non-linear genetic effects in a cohort of 1,757 individuals from the  
407 FinnGen project<sup>8</sup>. Olink protein levels were available for 170 of the 171 proteins with significant  
408 performance gap in the UKB. We were able to replicate the dominance effect of the *ABO* blood  
409 group tagging variants rs505922 and rs8176719 on plasma levels of CD209 and CLEC4M (**Figure**  
410 **5a-b, Supplementary Figure 3a**). Furthermore, we investigated protein levels of FAM3D in  
411 individuals with different genotype combinations of *ABO* variant rs507666 and *FUT3* variant  
412 rs812936 and found higher levels in individuals with the GG-GG combination (**Figure 5c**). This  
413 replicated the discovery of this rare interaction in the UKB (**Figure 3i**), despite the much lower  
414 sample size and interaction allele counts (AC=43) in FinnGen. For ALPI, MUC2 and FAM3D we  
415 replicated the epistatic effect of rs507666 and the *IZUMO1* variant rs2307019, resembling *ABO*  
416 and *FUT2* secretor status interaction, on protein levels similar to the UKB (**Supplementary**  
417 **Figure 5a**). Next, we sought to replicate the ability of our EIR-auto-GP workflow to identify non-  
418 linear effects using the FinnGen cohort<sup>8</sup>. Using 1,231 and 263 individuals for training and test,  
419 respectively, we could replicate the discovery of potential non-linear covariate effects for FSHB  
420 and PAEP and potential non-linear genetic effects for MUC2, FAM3D and CD209  
421 (**Supplementary Figure 5b**). We noticed that 94 of the 170 proteins had a higher DL performance  
422 in FinnGen compared to the UKB (**Supplementary Figure 5c**). We speculate that this was due to  
423 the different age distribution of the FinnGen cohort compared to the UKB (Median age FinnGen:  
424 53 years, UKB: 58 years) (**Supplementary Figure 5d**). These results demonstrated that our DL  
425 model can predict protein levels from genotype and covariate data across cohorts. In summary, we  
426 were able to both directly replicate the dominance and interaction effects we discovered in UKB  
427 and, despite the significantly lower sample size, replicate the EIR-auto-GP workflow by re-  
428 discovery of non-linear effects of several proteins in FinnGen.

429

430

431

432

433 **Validating discovery of non-linear effects using mass spectrometry-based proteomics**

434 Finally, we aimed to replicate our analyses by training models using data generated by a different  
435 proteomics technology. We therefore, as above, retrained models using a Danish cohort of obese  
436 children measured using mass spectrometry based (MS) proteomics (The HOLBAEK Study)<sup>10</sup>.  
437 The cohort consisted of 1,924 children and adolescents between the age of 5–20 years (**Methods**),  
438 from which our group previously described the genetic regulation of its plasma proteome<sup>10</sup>. Similar  
439 to the approach in the UKB and FinnGen, we trained models for 411 MS protein levels in 1,533  
440 individuals and tested their performance in 190 individuals (**Supplementary Table 8**). Despite  
441 the significantly lower sample size, we observed a similar trend in performance gaps, where the  
442 DL model outperformed the linear model on the majority of proteins (246 of 411; 69%)  
443 (**Supplementary Figure 5e**). Additionally, with a similar stringent cutoff as in the UKB, we  
444 identified 6 (1.6%) proteins that showed a significant (non-overlapping confidence intervals)  
445 increase when using the DL model (**Figure 5d**). When modeling protein levels only from  
446 covariates using non-linear (XGBoost) and linear models, we found that the DL performance of  
447 the significant proteins was likely driven by non-linear covariate effects (**Figure 5e**). Consistently,  
448 we found that COL1A1 levels were influenced by non-linear effects between age and sex  
449 (**Supplementary Figure 5f**). Taken together, these results demonstrate that our approach can be  
450 applied to proteomics data acquired by different assays including both mass spectrometry-based  
451 and affinity-based approaches.

452

**Figure 5**

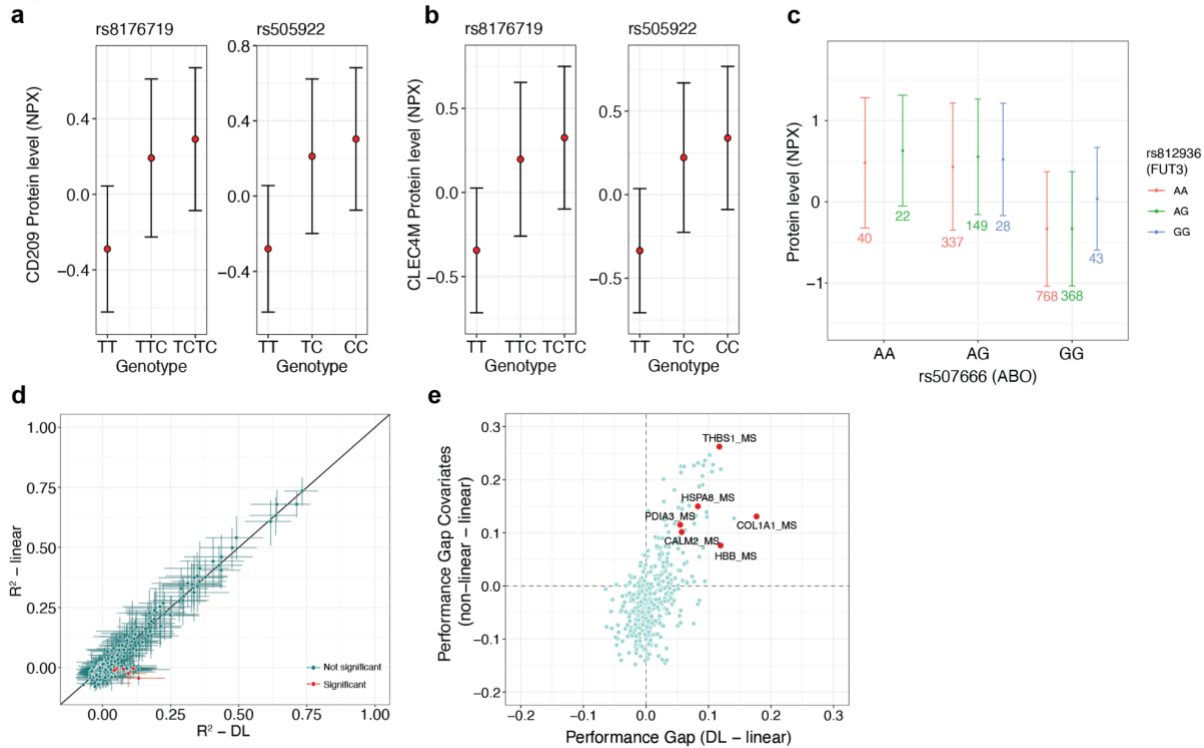

453  
 454 **Figure 5. Replication of non-linear effects across cohorts and platforms.** **a)** Protein levels (NPX) of CD209 in  
 455 individuals with different genotypes of rs505922 and rs8176719 in the FinnGen project. Error bars indicate standard  
 456 deviation. **b)** Protein levels (NPX) of CLEC4M in individuals with different genotypes of rs505922 and rs8176719 in  
 457 the FinnGen project. Error bars indicate standard deviation. **c)** Protein levels (NPX) of FAM3D in individuals with  
 458 different genotype combinations of rs507666 and rs812936. The numbers indicate the number of individuals with  
 459 respective combinations. Error bars indicate standard deviation. Data points with < 5 individuals were removed. **d)**  
 460 DL (EIR) and linear (bigstatsr) model performance ( $R^2$ ) for all 411 proteins measured by MS in The HOLBAEK  
 461 Study. The error bars indicate the 95% confidence interval from 1000 bootstraps, and proteins with non-overlapping  
 462 confidence intervals between DL and linear models are called significant and labeled in red. **e)** Performance gap  
 463 between DL and linear models on genotype and covariates against the performance gap between non-linear (XGBoost)  
 464 and linear models on covariates only. Results for all 411 proteins are shown, and proteins with significant performance  
 465 gaps between DL and linear model are labeled in red.

466  
 467 **Discussion**

468 Here, we present a large-scale, systematic attempt to study non-linear genetic and covariate  
 469 interactions that affect blood plasma protein levels. We used DL on genetics and plasma  
 470 proteomics data of 48,594 individuals from the UK Biobank to identify proteins with underlying  
 471 complex effects. While replicating the effect of many pQTLs from Sun et al., our results indicate

472 that many non-linear effects are present, illustrated by the increased performance of the deep  
473 learning models compared to linear models. Of the 2,922 measured proteins, we identified 138  
474 proteins potentially regulated by non-linear effects like non-linear covariate effects (n=123), or  
475 genetic dominance and epistatic interactions between variants (n=15). Our modeling of non-linear  
476 relationships between covariates that influence protein levels were in line with previous reports<sup>6,25</sup>.  
477 Many associations have previously been established between plasma proteomics and demographic  
478 factors such as age, sex and BMI, and health indications such as liver function<sup>6,10</sup>. We show that  
479 complex relationships between non-genetic factors are widespread, and we speculate that, if we  
480 included additional covariates in our analysis (i.e., BMI) we could uncover biologically relevant  
481 non-linear relationships. This was outside the scope of the current study but will likely be the  
482 subject of future research. We demonstrate that genetic dominance within loci that affect protein  
483 levels is rare. This is consistent with previous studies that highlight the robustness of additive  
484 models when modeling human traits<sup>18</sup>. However, we identified a small group of proteins that are  
485 likely influenced by dominance effects in the *ABO* locus. Additionally, we could replicate epistatic  
486 interactions between the *ABO* locus and the *FUT2* secretor status that regulate plasma levels of  
487 intestinal proteins, as demonstrated before<sup>6</sup>. This shows that our approach can identify epistatic  
488 interactions in an unbiased fashion. We also uncovered novel interactions between the *ABO* and  
489 *FUT3* loci that influence plasma levels of the intestinally expressed protein FAM3D.

490  
491 We uncovered complex effects that improve our understanding of biological pathways, which is a  
492 major focus in the V2F challenge. For example, we identified dominance effects of variants in the  
493 *ABO* locus on protein levels of CD209, CLEC4M and other proteins. The relationship between the  
494 *ABO* locus, specifically the *ABO* blood group system, and plasma abundance of proteins involved  
495 in the immune response, could advance our understanding of varying susceptibility to infectious  
496 diseases among individuals with different blood types<sup>53-55</sup>. Specifically, CD209 and CLEC4M act  
497 as attachment receptors for HIV-1 & 2, Ebola virus and other viral and bacterial pathogens<sup>56,57</sup>.  
498 Further, CD209 has been suggested to enhance ACE2-mediated SARS-CoV-2 infection<sup>58</sup>.  
499 Previous studies have also linked variants in the *ABO* locus with plasma levels of CD209<sup>6,59</sup>. Here,  
500 we demonstrate that individuals with A, B or AB blood-type have higher plasma levels of CD209  
501 and CLEC4M. This suggests a mechanism where the *ABO* blood group system modulates  
502 pathogen recognition of dendritic cells through CD209 and CLEC4M, which could be an important

503 link between the *ABO* locus and its impact on susceptibility to infectious diseases. Detailed  
504 mechanisms of how either the *ABO* encoded alpha 1-3-Galactosyltransferase or the *ABO* blood  
505 group antigens regulate levels of CD209 and CLEC4M remain unclear.

506  
507 To conduct our analyses, we developed the EIR-auto-GP software toolkit, designed to enable other  
508 researchers to apply our DL approach to their studies. The toolkit consists of a fully automated  
509 pipeline, allowing for the integration of genetic and covariate data for modeling on quantitative  
510 and binary traits. We emphasize that the built-in variant pre-filtering approaches in EIR-auto-GP  
511 allow for training on large-scale genetic data directly on CPUs—demonstrated by our ability to  
512 train DL models across ten cross-validation (CV) runs in three hours for a single protein on a 16-  
513 core computer on DNAnexus. This feature lowers the barrier for entry to research teams without  
514 access to high-cost hardware accelerators typically associated with DL.

515  
516 Given that some proteins showed a gap in performance between EIR-auto-GP and the linear  
517 benchmark models, we wanted to examine what exact factors, e.g., complex effects in the covariate  
518 data, dominance effects and interaction effects between SNVs were driving the performance gaps.  
519 Therefore, we integrated the ability to fit both linear and non-linear models on different  
520 transformations of the input data into EIR-auto-GP. This included the use of covariate only data,  
521 additive and one-hot encoded genotype data, allowing us to specifically analyze the impact of these  
522 factors. For a more detailed analysis into the exact genetic components that might be driving the  
523 performance gaps, we used ordinary least squares (OLS) models for examining SNV genotypes  
524 separately as well as SNV-SNV interaction effects. We hope that EIR-auto-GP will help advance  
525 genetic research by providing an accessible DL toolkit to model complex genetic effects that  
526 influence molecular and disease traits, thereby addressing important aspects of the V2F challenge.

527  
528 We initially trained and tested our models on individuals of self-reported white ethnicity, as this  
529 is the largest group of individuals with very similar ancestral backgrounds in the UK Biobank and  
530 the UKB-PPP<sup>3,6</sup>. When testing the models on sets of different self-reported ethnicity groups, we  
531 observed reduced performance for linear and DL models, which was potentially due to differences  
532 in population structure<sup>46,60</sup>. This study serves as a proof-of-concept of our approach to capture non-

533 linear effects that influence protein abundances, and it should be applied to more diverse cohorts  
534 in the future.

535  
536 We replicated the effect of the identified epistatic *ABO-FUT3* interaction on plasma levels of  
537 FAM3D, MUC2 and ALPI, as well as the dominance effect of the *ABO* locus on plasma levels of  
538 CD209 and CLEC4M in the FinnGen cohort. This demonstrates that our findings are transferable  
539 beyond the UK-white population of the UK Biobank to other populations. However, given the 20-  
540 fold smaller sample size, the DL models might not effectively detect these effects (e.g., due to  
541 overfitting) adequately for it to be reflected in significantly better test set performance.  
542 Additionally, the increased uncertainty, as indicated by larger confidence intervals, when  
543 evaluating the models on a much smaller test set makes it challenging to identify significant results,  
544 despite better performance metrics. However, the increasing availability of larger proteomics  
545 cohorts will enable the identification of non-linear genetic and covariate effects on protein  
546 abundance in an unbiased, large-scale manner.

547

## 548 **Limitations**

549 A large fraction of the blood plasma proteins could not be accurately modeled from genotypes and  
550 the chosen covariates using either the linear or DL model. This may be due to missing causal  
551 SNVs, or unaccounted environmental factors, such as BMI and health and disease conditions,  
552 which are known to affect protein levels<sup>6</sup>. Interestingly, we found that many proteins that we could  
553 not model had a low correlation with SomaScan measurements<sup>14</sup>. The comparability between  
554 Olink and other protein quantification methods is highly debated in the field<sup>14,61</sup>. Our findings  
555 might indicate that plasma levels for some proteins measured by Olink may not be entirely  
556 accurate, which can affect the performance of our models in the UKB. Advances in MS-based  
557 proteomics could allow for higher specificity and quantitative accuracy of plasma proteomics in  
558 large sample sizes comparable to those of the UKB in the future<sup>10,62</sup>.

559  
560 Regarding modeling, we used a threshold on the pre-GWAS analysis to limit the number of  
561 variants used as input to the DL model. The choice is not guaranteed to be optimal for modeling  
562 purposes of all proteins, and this step might filter variants with purely complex effects not detected  
563 in GWAS. Furthermore, UKB array data were used to conduct the analysis, which might affect the



564 completeness of genetic variants analyzed. Additionally, we modeled using both the Olink  
565 provided NPX and INT transformed protein abundance values. Modeling using the NPX values  
566 was motivated by preserving effect sizes of the protein levels, while modeling on the INT values  
567 was done to identify potential false positives. These could be caused by the non-linear nature of  
568 the NPX values that could favor the DL models over the linear models, which we found to be the  
569 case for 33 of the proteins. However, performing the INT transformation removes the notion of  
570 scale in the data, effectively converting the data to ranks, which in itself impacts modeling. For  
571 instance, we found that both the DL and linear model had reduced  $R^2$  when modeling on INT  
572 compared to NPX values, indicating that there was a general loss of information.

573  
574 While our approach of using differences in performance gaps can identify protein levels modulated  
575 by interaction effects, it likely does not identify rare interactions. For example, using the OLS  
576 models we identified an interaction between variants in the *ABO* and *FUT3* loci which has a low  
577 frequency in the present cohort (~2%). These rare effects are unlikely to be learned during model  
578 training, and even if captured, may not significantly impact test set performance. This indicates  
579 that even the ~50,000 samples of the UKB-PPP might be too small to discover rare variant  
580 interactions using our approach.

581  
582 **Conclusions and future directions**

583 While the majority of pQTL studies are performed using additive linear models, we demonstrate  
584 that non-additive, complex genetic effects can influence plasma protein levels. Modeling complex  
585 traits requires models that can learn from complex relationships in the input data. DL makes it  
586 possible to do such analysis and is not, as in our case, restricted to modeling plasma proteomics  
587 but can additionally be applied to model other molecular traits and environmental effects.  
588 Furthermore, such approaches can model covariate and environmental effects without specifying  
589 interaction terms a priori and could be used for discovering interaction effects such as ExE and  
590 GxE effects. Overall, we conclude that DL has provided additional value in understanding the  
591 complex genetic regulation of molecular traits and that discoveries of complex effects will likely  
592 scale with larger sample sizes and more diverse cohorts.

593  
594

## 595 **Methods**

596

### 597 **Experimental setup and processing of UK Biobank data**

598 In the genomic quality control (QC) process, we utilized PLINK v1.90b7<sup>63</sup> for data analysis and  
599 filtering. Our dataset initially consisted of 784,256 autosomal variants and 488,377 individuals.  
600 We removed individuals with a relatedness factor  $\geq 0.0884$  (second degree relatedness), resulting  
601 in 453,581 individuals kept for the analysis. We applied the following QC filters: individuals with  
602 more than 10% missing genotype data (--mind 0.10) were excluded, resulting in the removal of 6  
603 individuals, with 453,575 remaining. Variant level QC involved removing variants with more than  
604 1% missing data (--geno 0.01), leading to the exclusion of 143,713 variants. Additionally, variants  
605 failing the Hardy-Weinberg Equilibrium test at a threshold of 0.000001 (--hwe 0.000001) were  
606 removed, accounting for 153,825 variants. We also applied a minor allele frequency (MAF)  
607 threshold of 0.005 (--maf), resulting in the exclusion of 62,621 variants. After the application of  
608 these QC steps, the final dataset comprised 424,097 variants and 453,575 individuals. We divided  
609 the individuals into train, validation, and test sets for the modeling. In the training dataset, we  
610 included exclusively individuals with self-reported ‘UK-white’ ethnicity from Olink batches 0-6.  
611 Batch 7 contains consortium selected individuals and individuals from the COVID-19 imaging  
612 study and do not follow UKB baseline characteristics<sup>6</sup>. To this end, individuals from batch 7 and  
613 all individuals with non-UK-white ethnicity were excluded from the training dataset. Additionally,  
614 individuals from batch 7 were excluded in the UK-white test set (n=1,771) used throughout the  
615 study. Access to the UK Biobank data was obtained through application 1251 “The metabolically  
616 healthy obese and metabolically obese normal-weight in the UK Biobank: Prevalence, genes and  
617 lifestyle contributors, disease risk and mortality”.

618

### 619 **Deep learning model training**

620 The main deep learning models on the UKB were trained with the EIR-auto-GP toolkit  
621 (<https://github.com/arnor-sigurdsson/EIR-auto-GP>, commit fb41457). The ordinary least squares  
622 (OLS) estimation for allele effects and interaction effects was also done with the toolkit, as well  
623 as the direct estimation of protein levels as a function of genotype combinations (commit  
624 0d5d762). Besides the genotype input data, categorical covariate inputs were sex, UKB center,  
625 UKB genetic array and whether individuals were consortium selected. Continuous inputs were age

626 and genetic principal components 1-20 (UKB data field 22009). Each protein level run consisted  
627 of 10 holdout cross validation (CV) runs, using a pre-defined validation set for consistency across  
628 runs. Despite repeated use of the same training-validation split, the models differed in each run  
629 due to several factors: (a) random initialization of the models; (b) the order of data during mini-  
630 batching during training was shuffled independently each run; and (c) while the first 3 CV runs  
631 shared a common set of SNVs, the subsequent 7 runs used a different set of SNVs as determined  
632 by a Bayesian optimization process (see below). For each protein level run, a GWAS pre-selection  
633 with a p-value of 0.001 was applied to the training set and used to reduce the number of variants  
634 input to the DL models. The first 3 CV runs used the full set of variants that passed the GWAS  
635 pre-selection step, and DL attributions were computed with integrated gradients<sup>64</sup> on the validation  
636 set. After the first 3 CV runs, a Bayesian optimization (BO) loop was applied to optimize for the  
637 top variants to include in the following 7 CV runs. The BO was implemented with scikit-optimize  
638 (v.0.9.0)<sup>65</sup>, with the objective of optimizing the fraction of top SNVs regarding validation set  
639 performance. The top variants were defined by averaging the absolute DL attributions computed  
640 on the validation set across the first 3 CV runs. After training the DL models for all 10 CV runs, a  
641 final ensemble prediction was applied to the test set.

642

### 643 **Linear model benchmarking**

644 The training of linear benchmark models was done with bigsnpr (1.12.2)<sup>33</sup> and bigstatsr (1.5.12)<sup>33</sup>.  
645 All 424,097 variants were used as input for the model, as well as the covariates sex, age, UKB  
646 center, UKB genetic array, whether individuals were consortium selected and genomic principal  
647 components 1-20. The modeling was conducted with a 10-fold cross-validation (CV) employing a  
648 grid search for the  $\alpha$  mixing parameter in the elastic net, exploring values [0.0001, 0.001, 0.01,  
649 0.1, 1]. Additionally, the approach involves testing multiple values for the  $\lambda$  penalization parameter  
650 (default 200). Following this, an ensemble-like process across the CV runs was executed to  
651 generate the final model, which was subsequently assessed using the test set.

652

### 653 **Model performance**

654 The test set predictions of the trained DL and linear models were bootstrapped (n=1,000) and R<sup>2</sup>  
655 and RMSE calculated for each bootstrap generation using sklearn.metrics.r2\_score and  
656 sklearn.metrics.mean\_squared\_error. From the resulting distribution, the 95% confidence intervals

657 were calculated using the 2.5% and 97.5% percentiles for each protein. Performance gaps were  
658 calculated for each protein by subtracting the mean bootstrapped  $R^2$  of the linear models from the  
659 mean bootstrapped  $R^2$  of the DL or non-linear models.

660

### 661 **Self reported ethnic grouping**

662 Individuals were stratified according to self-reported ethnic background in the UKB (data field  
663 21000). The individual groups were consolidated into 5 main groups for the purpose of the study.  
664 The groups were defined as “White”, “South Asian”, “East Asian”, “African”, and “Caribbean”.  
665 The “White” group included British, Irish, and other individuals with white backgrounds. The  
666 “South Asian” group comprised individuals of Indian, Pakistani, Bangladeshi. Those of Chinese  
667 self-reported ethnicities were categorized as “East Asian.” “African” and “Caribbean” groups were  
668 kept as indicated in data field 21000.

669

### 670 **Model Complexity Analysis**

671 To examine which factors might be contributing to performance differences between the linear  
672 and DL models, we systematically explored various data configurations for the covariate and  
673 genotype input data. Specifically, we generated 5 different sets of input data configurations: tabular  
674 (covariate) data alone, additively encoded genotype data exclusively, one-hot encoded genotype  
675 data exclusively, additively encoded genotype with tabular data, and one-hot encoded genotype  
676 data with tabular data. The one-hot encoding was used to examine whether a linear model allowed  
677 to fit on genotypes separately would close the performance gap (e.g., due to effects in the data  
678 resembling dominance). For each of these five data configurations, we trained a linear Elastic Net  
679 model as well as a non-linear XGBoost model, resulting in 10 different data-model combinations.  
680 To limit the computational complexity, we limited the genotypes to the top 128 SNVs. These were  
681 selected base on the absolute DL attribution scores, which were computed on the validation set in  
682 the first 3 CV runs in the main experiments, then averaged. The same training, validation and test  
683 set splits were used as in the main experiments.

684

### 685 **Genetic non-additivity analysis**

686 Beyond examining performance differences between linear models when using an additive or one-  
687 hot encoding, we also fit Ordinary Least Squares (OLS) models on each of the top 128 SNVs,

688 where the models were fit on each genotype separately ( $\text{Target} = \beta_0 + \beta_1 \times \text{SNV}_1 + \beta_2 \times \text{SNV}_2 + \beta_3$   
689  $\times \text{SNV}_3 + \text{covariates} + \epsilon$ ). By examining the p-values and effect sizes coefficients assigned to each  
690 genotype, we could explore for each SNV whether it deviated from an additive relationship  
691 towards a protein level.

692

### 693 **Genetic interaction analysis**

694 In addition to investigating performance disparities between the linear and non-linear XGBoost  
695 models, we explored potential pairwise interactions among the top 128 SNVs. This entailed fitting  
696 Ordinary Least Squares (OLS) models on all possible pairwise combinations of SNVs, where each  
697 model utilized each SNV (one-hot encoded) as inputs along with the product interaction term  
698 between them ( $\text{Target} = \beta_0 + \beta_{11} \times \text{SNV}_{11} + \beta_{12} \times \text{SNV}_{12} + \dots + \beta_{21} \times \text{SNV}_{21} + \beta_{22} \times \text{SNV}_{22} + \dots$   
699  $+ \beta_3 \times (\text{SNV}_1 \times \text{SNV}_2) + \text{covariates} + \epsilon$ ). Across all traits, we tested a total of 1,389,888 pairs, and  
700 as such applied a p-value threshold of  $0.05 / 1,389,888 = 3.6\text{e-}08$ . This approach allowed us to  
701 identify which SNV pairs might contribute most to any remaining performance gap between the  
702 linear model using one-hot encoded genotype data with tabular data and the XGBoost model  
703 trained on the same data.

704

### 705 **Replication in MS-based proteomics data from The HOLBAEK Study**

706 The HOLBAEK Study consisted of 2,147 children and adolescents (55% girls) between the age of  
707 5 and 20, recruited from the Children's Obesity Clinic, accredited Centre for Obesity Management,  
708 Copenhagen University Hospital Holbæk, Denmark<sup>66</sup>, and a population-based cohort recruited from  
709 schools in 11 municipalities across Zealand, Denmark<sup>67</sup>. Besides age, an eligibility criteria of the  
710 Obesity Clinic was BMI above the 90th percentile (BMI SDS  $\geq 1.28$ ) according to Danish  
711 reference values. The study protocol for The HOLBAEK Study was approved by the ethics  
712 committee for the Region Zealand (protocol no. SJ-104) and is registered at the Danish Data  
713 Protection Agency (REG-043-2013). The HOLBAEK Study including the obesity clinic cohort  
714 and the population-based cohort are also registered at ClinicalTrials.gov (NCT00928473). The MS  
715 based proteomics data consisted of 411 protein levels measured across 2,130 of the 2,147 samples,  
716 with genotype data available for 1,924 individuals featuring 5,242,958 variants after quality  
717 control and filtering<sup>10</sup>. Due to the imbalance in the number of features compared to the number of  
718 samples, we used PLINK to perform LD pruning (`--indep-pairwise 50 5 0.8`), reducing the variant

719 count to 998,505. We then matched and retained only those samples for which both genotype and  
720 phenotype data were available, identifying 1,893 samples with complete data sets. Following the  
721 EIR-auto-GP data processing pipeline, data splits were defined as 1,533 training, 170 validation,  
722 and 190 test samples. Besides the genotype data, covariates included were sex, BMI, age, time to  
723 analysis, MS batch information. Due to the smaller sample size compared to the UKB, we used  
724 20-fold cross validation (CV) instead of the 10-fold applied in the UKB. EIR-auto-GP (commit  
725 2934974) was used for DL model training and additionally, we found that the default feature  
726 selection approach in EIR-auto-GP (i.e., a fixed GWAS threshold and DL attribution based  
727 Bayesian optimization (BO) of included SNVs) was susceptible to overfitting in this dataset, based  
728 on training and validation set performance. To address this, we devised an alternative, simpler  
729 approach focusing on dynamic SNV inclusion based on GWAS p-value rankings. The optimization  
730 process began with seeding the algorithm with manual fractions, reflecting SNV subsets from the  
731 most significant (p-value threshold of  $1e-8$ ) to the least (up to a p-value of  $1e-4$ ). After this, the  
732 BO process to find the optimal fraction of SNVs was allowed to proceed. We found that this  
733 approach guided more efficiently towards using fewer SNVs, which resulted in better validation  
734 performance.

735

### 736 **Replication in FinnGen Olink data**

737 The FinnGen quality controlled Olink data consisted of 2,925 measured protein levels across 1,990  
738 samples, with genotype data available for 520,210 individuals and 21,331,644 variants initially.  
739 The variants were filtered to match those used in the UKB experiments, resulting in a final set of  
740 416,802 variants. Retaining only samples where genotype and phenotype data were available, our  
741 final set consisted of 1,757 samples. Data splits were defined as 1,231 training, 263 validation and  
742 263 test samples. Besides the genotype data, covariates included blood sampling age, sex, genetic  
743 testing chip and batch, top 20 genetic PCs and protein examination batch. The DL model training  
744 was performed with EIR-auto-GP (commit c141b5a) and the training procedure was the same as  
745 described above for the data set from The HOLBAEK Study.

746

### 747 **FinnGen Ethics statement**

748 Study subjects in FinnGen provided informed consent for biobank research, based on the Finnish  
749 Biobank Act. Alternatively, separate research cohorts, collected prior the Finnish Biobank Act



750 came into effect (in September 2013) and start of FinnGen (August 2017), were collected based  
751 on study-specific consents and later transferred to the Finnish biobanks after approval by Fimea  
752 (Finnish Medicines Agency), the National Supervisory Authority for Welfare and Health.  
753 Recruitment protocols followed the biobank protocols approved by Fimea. The Coordinating  
754 Ethics Committee of the Hospital District of Helsinki and Uusimaa (HUS) statement number for  
755 the FinnGen study is Nr HUS/990/2017.

756 The FinnGen study is approved by Finnish Institute for Health and Welfare (permit numbers:  
757 THL/2031/6.02.00/2017, THL/1101/5.05.00/2017, THL/341/6.02.00/2018,  
758 THL/2222/6.02.00/2018, THL/283/6.02.00/2019, THL/1721/5.05.00/2019 and  
759 THL/1524/5.05.00/2020), Digital and population data service agency (permit numbers:  
760 VRK43431/2017-3, VRK/6909/2018-3, VRK/4415/2019-3), the Social Insurance Institution  
761 (permit numbers: KELA 58/522/2017, KELA 131/522/2018, KELA 70/522/2019, KELA  
762 98/522/2019, KELA 134/522/2019, KELA 138/522/2019, KELA 2/522/2020, KELA  
763 16/522/2020), Findata permit numbers THL/2364/14.02/2020, THL/4055/14.06.00/2020,  
764 THL/3433/14.06.00/2020, THL/4432/14.06/2020, THL/5189/14.06/2020,  
765 THL/5894/14.06.00/2020, THL/6619/14.06.00/2020, THL/209/14.06.00/2021,  
766 THL/688/14.06.00/2021, THL/1284/14.06.00/2021, THL/1965/14.06.00/2021,  
767 THL/5546/14.02.00/2020, THL/2658/14.06.00/2021, THL/4235/14.06.00/2021, Statistics Finland  
768 (permit numbers: TK-53-1041-17 and TK/143/07.03.00/2020 (earlier TK-53-90-20)  
769 TK/1735/07.03.00/2021, TK/3112/07.03.00/2021) and Finnish Registry for Kidney Diseases  
770 permission/extract from the meeting minutes on 4<sup>th</sup> July 2019.

771 The Biobank Access Decisions for FinnGen samples and data utilized in FinnGen Data Freeze 11  
772 include: THL Biobank BB2017\_55, BB2017\_111, BB2018\_19, BB\_2018\_34, BB\_2018\_67,  
773 BB2018\_71, BB2019\_7, BB2019\_8, BB2019\_26, BB2020\_1, BB2021\_65, Finnish Red Cross  
774 Blood Service Biobank 7.12.2017, Helsinki Biobank HUS/359/2017, HUS/248/2020,  
775 HUS/430/2021 §28, §29, HUS/150/2022 §12, §13, §14, §15, §16, §17, §18, §23, §58, §59,  
776 HUS/128/2023 §18, Auria Biobank AB17-5154 and amendment #1 (August 17 2020) and  
777 amendments BB\_2021-0140, BB\_2021-0156 (August 26 2021, Feb 2 2022), BB\_2021-0169,  
778 BB\_2021-0179, BB\_2021-0161, AB20-5926 and amendment #1 (April 23 2020) and it's  
779 modifications (Sep 22 2021), BB\_2022-0262, BB\_2022-0256, Biobank Borealis of Northern  
780 Finland\_2017\_1013, 2021\_5010, 2021\_5010 Amendment, 2021\_5018, 2021\_5018 Amendment,



781 2021\_5015, 2021\_5015 Amendment, 2021\_5015 Amendment\_2, 2021\_5023, 2021\_5023  
782 Amendment, 2021\_5023 Amendment\_2, 2021\_5017, 2021\_5017 Amendment, 2022\_6001,  
783 2022\_6001 Amendment, 2022\_6006 Amendment, 2022\_6006 Amendment, 2022\_6006  
784 Amendment\_2, BB22-0067, 2022\_0262, 2022\_0262 Amendment, Biobank of Eastern Finland  
785 1186/2018 and amendment 22§/2020, 53§/2021, 13§/2022, 14§/2022, 15§/2022, 27§/2022,  
786 28§/2022, 29§/2022, 33§/2022, 35§/2022, 36§/2022, 37§/2022, 39§/2022, 7§/2023, 32§/2023,  
787 33§/2023, 34§/2023, 35§/2023, 36§/2023, 37§/2023, 38§/2023, 39§/2023, 40§/2023, 41§/2023,  
788 Finnish Clinical Biobank Tampere MH0004 and amendments (21.02.2020 & 06.10.2020),  
789 BB2021-0140 8§/2021, 9§/2021, §9/2022, §10/2022, §12/2022, 13§/2022, §20/2022, §21/2022,  
790 §22/2022, §23/2022, 28§/2022, 29§/2022, 30§/2022, 31§/2022, 32§/2022, 38§/2022, 40§/2022,  
791 42§/2022, 1§/2023, Central Finland Biobank 1-2017, BB\_2021-0161, BB\_2021-0169, BB\_2021-  
792 0179, BB\_2021-0170, BB\_2022-0256, BB\_2022-0262, BB22-0067, Decision allowing to  
793 continue data processing until 31<sup>st</sup> Aug 2024 for projects: BB\_2021-0179, BB22-0067, BB\_2022-  
794 0262, BB\_2021-0170, BB\_2021-0164, BB\_2021-0161, and BB\_2021-0169, and Terveystalo  
795 Biobank STB 2018001 and amendment 25<sup>th</sup> Aug 2020, Finnish Hematological Registry and  
796 Clinical Biobank decision 18<sup>th</sup> June 2021, Arctic biobank P0844: ARC\_2021\_1001.

797

## 798 **Acknowledgments**

799 S.R. and M.M. were supported by the Novo Nordisk Foundation (NNF14CC0001). S.R., J.F.G.,  
800 R.L. and T.H. were supported by the Novo Nordisk Foundation (NNF23SA0084103). S.R., R.L.  
801 and B.M.N. were supported by the Novo Nordisk Foundation (NNF21SA0072102). J.F.G. was  
802 supported by a research grant from the Danish Cardiovascular Academy, which is funded by the  
803 Novo Nordisk Foundation, grant number NNF20SA0067242 and The Danish Heart Foundation.  
804 This research has been conducted using the UK Biobank Resource under Application Number  
805 1251. Our gratitude goes to all participants and their families from the UK Biobank and The  
806 HOLBAEK Study. We want to acknowledge the participants and investigators of the FinnGen  
807 study. The FinnGen project is funded by two grants from Business Finland (HUS 4685/31/2016  
808 and UH 4386/31/2016) and the following industry partners: AbbVie Inc., AstraZeneca UK Ltd,  
809 Biogen MA Inc., Bristol Myers Squibb (and Celgene Corporation & Celgene International II Sàrl),  
810 Genentech Inc., Merck Sharp & Dohme LCC, Pfizer Inc., GlaxoSmithKline Intellectual Property  
811 Development Ltd., Sanofi US Services Inc., Maze Therapeutics Inc., Janssen Biotech Inc, Novartis

812 AG, and Boehringer Ingelheim International GmbH. Following biobanks are acknowledged for  
813 delivering biobank samples to FinnGen: Auria Biobank ([www.auria.fi/biopankki](http://www.auria.fi/biopankki)), THL Biobank  
814 ([www.thl.fi/biobank](http://www.thl.fi/biobank)), Helsinki Biobank ([www.helsinginbiopankki.fi](http://www.helsinginbiopankki.fi)), Biobank Borealis of  
815 Northern Finland ([https://www.ppsHP.fi/Tutkimus-ja-opetus/Biopankki/Pages/Biobank-Borealis-](https://www.ppsHP.fi/Tutkimus-ja-opetus/Biopankki/Pages/Biobank-Borealis-briefly-in-English.aspx)  
816 [briefly-in-English.aspx](https://www.ppsHP.fi/Tutkimus-ja-opetus/Biopankki/Pages/Biobank-Borealis-briefly-in-English.aspx)), Finnish Clinical Biobank Tampere ([www.tays.fi/en-](http://www.tays.fi/en-US/Research%20and%20development/Finnish%20Clinical%20Biobank%20Tampere)  
817 [US/Research and development/Finnish Clinical Biobank Tampere](http://www.tays.fi/en-US/Research%20and%20development/Finnish%20Clinical%20Biobank%20Tampere)), Biobank of Eastern  
818 Finland ([www.ita-suomenbiopankki.fi/en](http://www.ita-suomenbiopankki.fi/en)), Central Finland Biobank ([www.ksshP.fi/fi-](http://www.ksshP.fi/fi-FI/Potilaille/Biopankki)  
819 [FI/Potilaille/Biopankki](http://www.ksshP.fi/fi-FI/Potilaille/Biopankki)), Finnish Red Cross Blood Service Biobank  
820 ([www.veripalvelu.fi/verenluovutus/biopankkitoiminta](http://www.veripalvelu.fi/verenluovutus/biopankkitoiminta)), Terveystalo Biobank  
821 ([www.terveystalo.com/fi/Yritystietoa/Terveystalo-Biopankki/Biopankki/](http://www.terveystalo.com/fi/Yritystietoa/Terveystalo-Biopankki/Biopankki/)) and Arctic Biobank  
822 ([https://www.oulu.fi/en/university/faculties-and-units/faculty-medicine/northern-finland-birth-](https://www.oulu.fi/en/university/faculties-and-units/faculty-medicine/northern-finland-birth-cohorts-and-arctic-biobank)  
823 [cohorts-and-arctic-biobank](https://www.oulu.fi/en/university/faculties-and-units/faculty-medicine/northern-finland-birth-cohorts-and-arctic-biobank)). All Finnish Biobanks are members of BBMRI.fi infrastructure  
824 (<https://www.bbmri-eric.eu/national-nodes/finland/>). Finnish Biobank Cooperative -FINBB  
825 (<https://finbb.fi/>) is the coordinator of BBMRI-ERIC operations in Finland. The Finnish biobank  
826 data can be accessed through the Fingenious<sup>®</sup> services (<https://site.fingenious.fi/en/>) managed by  
827 FINBB.

828

### 829 **Author contributions**

830 Conceptualization: S.R. Formal Analysis: A.I.S., J.F.G., Z.Y. Investigation: J.F.G., A.I.S.  
831 Methodology: A.I.S., J.F.G., J.M., K.R., R.T., H.W., R.A.J.S. Resources: S.R., R.L., T.H.  
832 Software: A.I.S. Supervision: S.R., R.J.F.L., T.H., B.V., A.G., B.M.N. Validation: Z.Y., A.G.,  
833 L.N., M.M. Visualization: J.F.G., A.I.S. Writing – original draft: A.I.S., J.F.G, S.R. Writing –  
834 review & editing: A.I.S., J.F.G, S.R., R.A.J.S., R.J.F.L., J.M., K.R., R.T., H.W.

835

### 836 **Competing interest**

837 S.R. is the founder and owner of BioAI. The remaining authors declare no competing interests.

838

### 839 **Code availability**

840 EIR is available at <https://github.com/arnor-sigurdsson/EIR>. EIR-auto-GP is available at  
841 <https://github.com/arnor-sigurdsson/EIR-auto-GP>.

842

843 **Data availability**

844 UK Biobank genotype, proteomics and covariate data is available to approved researchers through  
845 the UK Biobank (<https://www.ukbiobank.ac.uk/enable-your-research/apply-for-access>). All  
846 analyses using UK Biobank data were performed at the Research Analysis Platform at DNAnexus  
847 (<https://ukbiobank.dnanexus.com/>). Combined summary statistics of the per-protein GWAS  
848 performed in this study (Supplementary Data) are available through Zenodo  
849 (<https://doi.org/10.5281/zenodo.12654966>). Individual-level genotypes and register data from  
850 FinnGen participants can be accessed by approved researchers via the Fingenious portal  
851 (<https://site.fingenious.fi/en/>) hosted by the Finnish Biobank Cooperative FinBB  
852 (<https://finbb.fi/en/>). Data release to FinBB is timed to the biannual public release of FinnGen  
853 summary results, which occurs 12 months after FinnGen consortium members can start working  
854 with the data. Data from The HOLBAEK Study is not publicly available due to the need to  
855 maintain privacy of study participants but is available on reasonable request. Searchable results  
856 are available online at [proteomevariation.org](http://proteomevariation.org).

857

858 **References**

- 859 1. Claussnitzer, M. *et al.* A brief history of human disease genetics. *Nature* **577**, 179–189  
860 (2020).
- 861 2. Lappalainen, T. & MacArthur, D. G. From variant to function in human disease genetics.  
862 *Science* **373**, 1464–1468 (2021).
- 863 3. Bycroft, C. *et al.* The UK Biobank resource with deep phenotyping and genomic data.  
864 *Nature* **562**, 203–209 (2018).
- 865 4. Shilo, S. *et al.* 10 K: a large-scale prospective longitudinal study in Israel. *Eur. J.*  
866 *Epidemiol.* **36**, 1187–1194 (2021).
- 867 5. Ferkingstad, E. *et al.* Large-scale integration of the plasma proteome with genetics and  
868 disease. *Nat. Genet.* **53**, 1712–1721 (2021).
- 869 6. Sun, B. B. *et al.* Plasma proteomic associations with genetics and health in the UK Biobank.  
870 *Nature* **622**, 329–338 (2023).
- 871 7. Julkunen, H. *et al.* Atlas of plasma NMR biomarkers for health and disease in 118,461  
872 individuals from the UK Biobank. *Nat. Commun.* **14**, 604 (2023).
- 873 8. Kurki, M. I. *et al.* FinnGen provides genetic insights from a well-phenotyped isolated  
874 population. *Nature* **613**, 508–518 (2023).
- 875 9. Folkersen, L. *et al.* Genomic and drug target evaluation of 90 cardiovascular proteins in  
876 30,931 individuals. *Nature Metabolism* **2**, 1135–1148 (2020).
- 877 10. Niu, L. *et al.* Plasma proteome variation and its genetic determinants in children and  
878 adolescents. *bioRxiv* (2023) doi:10.1101/2023.03.31.23287853.
- 879 11. Niu, L. *et al.* Noninvasive proteomic biomarkers for alcohol-related liver disease. *Nat. Med.*  
880 **28**, 1277–1287 (2022).

- 881 12. Gudjonsson, A. *et al.* A genome-wide association study of serum proteins reveals shared  
882 loci with common diseases. *Nat. Commun.* **13**, 480 (2022).
- 883 13. Dhindsa, R. S. *et al.* Rare variant associations with plasma protein levels in the UK  
884 Biobank. *Nature* **622**, 339–347 (2023).
- 885 14. Eldjarn, G. H. *et al.* Large-scale plasma proteomics comparisons through genetics and  
886 disease associations. *Nature* **622**, 348–358 (2023).
- 887 15. Lourdasamy, A. *et al.* Identification of cis-regulatory variation influencing protein  
888 abundance levels in human plasma. *Hum. Mol. Genet.* **21**, 3719–3726 (2012).
- 889 16. Genetic control of the human brain proteome. *Am. J. Hum. Genet.* **108**, 400–410 (2021).
- 890 17. Ruffieux, H. *et al.* A fully joint Bayesian quantitative trait locus mapping of human protein  
891 abundance in plasma. *PLoS Comput. Biol.* **16**, e1007882 (2020).
- 892 18. Palmer, D. S. *et al.* Analysis of genetic dominance in the UK Biobank. *Science* **379**, 1341–  
893 1348 (2023).
- 894 19. Epistasis in sporadic Alzheimer’s disease. *Neurobiol. Aging* **30**, 1333–1349 (2009).
- 895 20. Robson, K. J. H. *et al.* Synergy between the C2 allele of transferrin and the C282Y allele of  
896 the haemochromatosis gene (HFE) as risk factors for developing Alzheimer’s disease. *J.*  
897 *Med. Genet.* **41**, 261–265 (2004).
- 898 21. Williams, S. M. *et al.* Combinations of Variations in Multiple Genes Are Associated With  
899 Hypertension. *Hypertension* (2000) doi:10.1161/01.HYP.36.1.2.
- 900 22. Elgart, M. *et al.* Non-linear machine learning models incorporating SNPs and PRS improve  
901 polygenic prediction in diverse human populations. *Commun Biol* **5**, 856 (2022).
- 902 23. Albiñana, C. *et al.* Multi-PGS enhances polygenic prediction by combining 937 polygenic  
903 scores. *Nat. Commun.* **14**, 1–11 (2023).

- 904 24. Machine learning optimized polygenic scores for blood cell traits identify sex-specific  
905 trajectories and genetic correlations with disease. *Cell Genomics* **2**, 100086 (2022).
- 906 25. McCaw, Z. R. *et al.* DeepNull models non-linear covariate effects to improve phenotypic  
907 prediction and association power. *Nat. Commun.* **13**, 241 (2022).
- 908 26. Badré, A., Zhang, L., Muchero, W., Reynolds, J. C. & Pan, C. Deep neural network  
909 improves the estimation of polygenic risk scores for breast cancer. *J. Hum. Genet.* **66**, 359–  
910 369 (2021).
- 911 27. Sigurdsson, A. I. *et al.* Deep integrative models for large-scale human genomics. *Nucleic*  
912 *Acids Res.* (2023) doi:10.1093/nar/gkad373.
- 913 28. Wu, Z. *et al.* Two-stage joint selection method to identify candidate markers from genome-  
914 wide association studies. *BMC Proc.* **3 Suppl 7**, S29 (2009).
- 915 29. Piriyaongsa, J. *et al.* iLOCi: a SNP interaction prioritization technique for detecting  
916 epistasis in genome-wide association studies. *BMC Genomics* **13 Suppl 7**, S2 (2012).
- 917 30. Motzo, C. *et al.* Heterogeneity in the magnitude of the insulin gene effect on HLA risk in  
918 type 1 diabetes. *Diabetes* **53**, 3286–3291 (2004).
- 919 31. Sigurdsson, A. I. *et al.* Improved prediction of blood biomarkers using deep learning.  
920 *medRxiv* (2022).
- 921 32. Snaebjarnarson, A. S. *et al.* Complex effects of sequence variants on lipid levels and  
922 coronary artery disease. *Cell* **186**, 4085–4099.e15 (2023).
- 923 33. Privé, F., Aschard, H., Ziyatdinov, A. & Blum, M. G. B. Efficient analysis of large-scale  
924 genome-wide data with two R packages: bigstatsr and bigsnpr. *Bioinformatics* **34**, 2781–  
925 2787 (2018).
- 926 34. Sharma, N. *XGBoost. The Extreme Gradient Boosting for Mining Applications.* (GRIN

- 927           Verlag, 2018).
- 928   35. Tabular data: Deep learning is not all you need. *Inf. Fusion* **81**, 84–90 (2022).
- 929   36. Grinsztajn, L., Oyallon, E. & Varoquaux, G. Why do tree-based models still outperform  
930       deep learning on tabular data? (2022).
- 931   37. Geijtenbeek, T. B. H. & Gringhuis, S. I. Signalling through C-type lectin receptors: shaping  
932       immune responses. *Nat. Rev. Immunol.* **9**, 465–479 (2009).
- 933   38. Guo, Y. *et al.* Structural basis for distinct ligand-binding and targeting properties of the  
934       receptors DC-SIGN and DC-SIGNR. *Nat. Struct. Mol. Biol.* **11**, 591–598 (2004).
- 935   39. Melzer, D. *et al.* A genome-wide association study identifies protein quantitative trait loci  
936       (pQTLs). *PLoS Genet.* **4**, e1000072 (2008).
- 937   40. Paré, G. *et al.* Novel association of ABO histo-blood group antigen with soluble ICAM-1:  
938       results of a genome-wide association study of 6,578 women. *PLoS Genet.* **4**, e1000118  
939       (2008).
- 940   41. Wolpin, B. M. *et al.* Pancreatic cancer risk and ABO blood group alleles: results from the  
941       pancreatic cancer cohort consortium. *Cancer Res.* **70**, 1015–1023 (2010).
- 942   42. Groot, H. E. *et al.* Genetically Determined ABO Blood Group and its Associations With  
943       Health and Disease. *Arterioscler. Thromb. Vasc. Biol.* **40**, 830–838 (2020).
- 944   43. Marcus, D. M. The ABO and Lewis blood-group system. Immunochemistry, genetics and  
945       relation to human disease. *N. Engl. J. Med.* **280**, 994–1006 (1969).
- 946   44. Sun, B. B. *et al.* Genomic atlas of the human plasma proteome. *Nature* **558**, 73–79 (2018).
- 947   45. Martin, A. R. *et al.* Clinical use of current polygenic risk scores may exacerbate health  
948       disparities. *Nat. Genet.* **51**, 584–591 (2019).
- 949   46. Duncan, L. *et al.* Analysis of polygenic risk score usage and performance in diverse human



- 950 populations. *Nat. Commun.* **10**, 3328 (2019).
- 951 47. Wang, Y. *et al.* Theoretical and empirical quantification of the accuracy of polygenic scores  
952 in ancestry divergent populations. *Nat. Commun.* **11**, 3865 (2020).
- 953 48. Privé, F. *et al.* Portability of 245 polygenic scores when derived from the UK Biobank and  
954 applied to 9 ancestry groups from the same cohort. *Am. J. Hum. Genet.* **109**, 373 (2022).
- 955 49. Wang, Y., Tsuo, K., Kanai, M., Neale, B. M. & Martin, A. R. Challenges and Opportunities  
956 for Developing More Generalizable Polygenic Risk Scores. *Annu Rev Biomed Data Sci* **5**,  
957 293–320 (2022).
- 958 50. Martin, A. R. *et al.* Human Demographic History Impacts Genetic Risk Prediction across  
959 Diverse Populations. *Am. J. Hum. Genet.* **100**, 635–649 (2017).
- 960 51. Tishkoff, S. A. *et al.* The genetic structure and history of Africans and African Americans.  
961 *Science* **324**, 1035–1044 (2009).
- 962 52. Moreno-Estrada, A. *et al.* Reconstructing the Population Genetic History of the Caribbean.  
963 *PLoS Genet.* **9**, e1003925 (2013).
- 964 53. Cserti, C. M. & Dzik, W. H. The ABO blood group system and *Plasmodium falciparum*  
965 malaria. *Blood* **110**, 2250–2258 (2007).
- 966 54. Wu, S.-C. *et al.* Blood group A enhances SARS-CoV-2 infection. *Blood* **142**, 742–747  
967 (2023).
- 968 55. Nordgren, J. & Svensson, L. Genetic Susceptibility to Human Norovirus Infection: An  
969 Update. *Viruses* **11**, (2019).
- 970 56. Geijtenbeek, T. B. H. *et al.* Identification of different binding sites in the dendritic cell-  
971 specific receptor DC-SIGN for intercellular adhesion molecule 3 and HIV-1. *J. Biol. Chem.*  
972 **277**, 11314–11320 (2002).

- 973 57. Lin, G. *et al.* Differential N-linked glycosylation of human immunodeficiency virus and  
974 Ebola virus envelope glycoproteins modulates interactions with DC-SIGN and DC-SIGNR.  
975 *J. Virol.* **77**, 1337–1346 (2003).
- 976 58. Lempp, F. A. *et al.* Lectins enhance SARS-CoV-2 infection and influence neutralizing  
977 antibodies. *Nature* **598**, 342–347 (2021).
- 978 59. Anisul, M. *et al.* A proteome-wide genetic investigation identifies several SARS-CoV-2-  
979 exploited host targets of clinical relevance. *Elife* **10**, (2021).
- 980 60. Gomez, F., Hirbo, J. & Tishkoff, S. A. Genetic variation and adaptation in Africa:  
981 implications for human evolution and disease. *Cold Spring Harb. Perspect. Biol.* **6**,  
982 a008524 (2014).
- 983 61. Katz, D. H. *et al.* Proteomic profiling platforms head to head: Leveraging genetics and  
984 clinical traits to compare aptamer- and antibody-based methods. *Sci Adv* **8**, eabm5164  
985 (2022).
- 986 62. Bader, J. M., Albrecht, V. & Mann, M. MS-Based Proteomics of Body Fluids: The End of  
987 the Beginning. *Mol. Cell. Proteomics* **22**, 100577 (2023).
- 988 63. Chang, C. C. *et al.* Second-generation PLINK: rising to the challenge of larger and richer  
989 datasets. *Gigascience* **4**, 7 (2015).
- 990 64. Sundararajan, M., Taly, A. & Yan, Q. Axiomatic Attribution for Deep Networks. (2017).
- 991 65. scikit-optimize/scikit-optimize. doi:10.5281/zenodo.5565057.
- 992 66. Holm, J.-C. *et al.* Chronic care treatment of obese children and adolescents. *Int. J. Pediatr.*  
993 *Obes.* **6**, 188–196 (2011).
- 994 67. Vissing Landgrebe, A. *et al.* Population-based pediatric reference values for serum  
995 parathyroid hormone, vitamin D, calcium, and phosphate in Danish/North-European white

996 children and adolescents. *Clin. Chim. Acta* **523**, 483–490 (2021).

997
